# Supplementary material
Source: PubMed Central journal article supplement (PMC4574253)
Supplement: 10.1534_115.177972_genetics.115.177972-1.pdf [file 10.1534_115.177972_genetics.115.177972-1.pdf]

**A***Sciara coprophila dsx*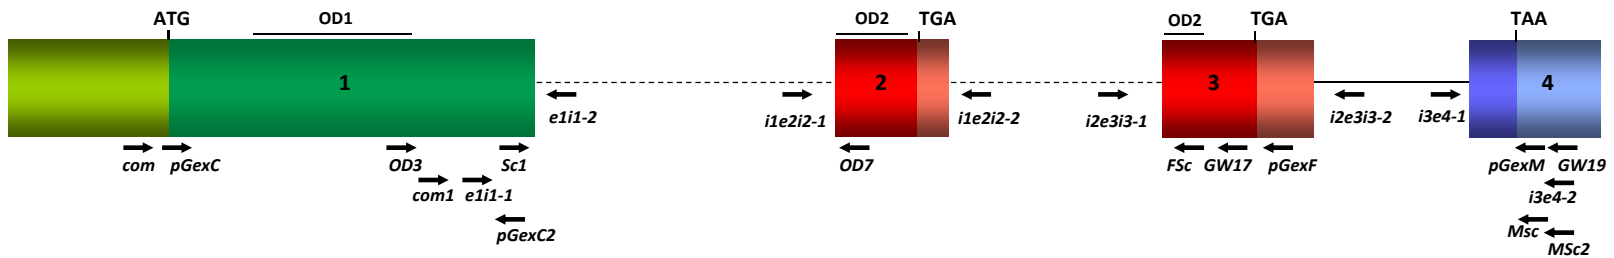**B***Sciara ocellaris dsx*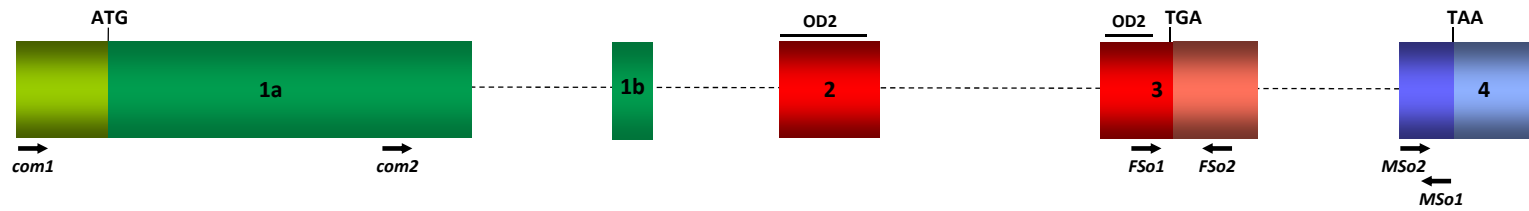

**Figure S1** Location of the primers used in this work. The prefix-*dsx* has been omitted in the name of the primers.

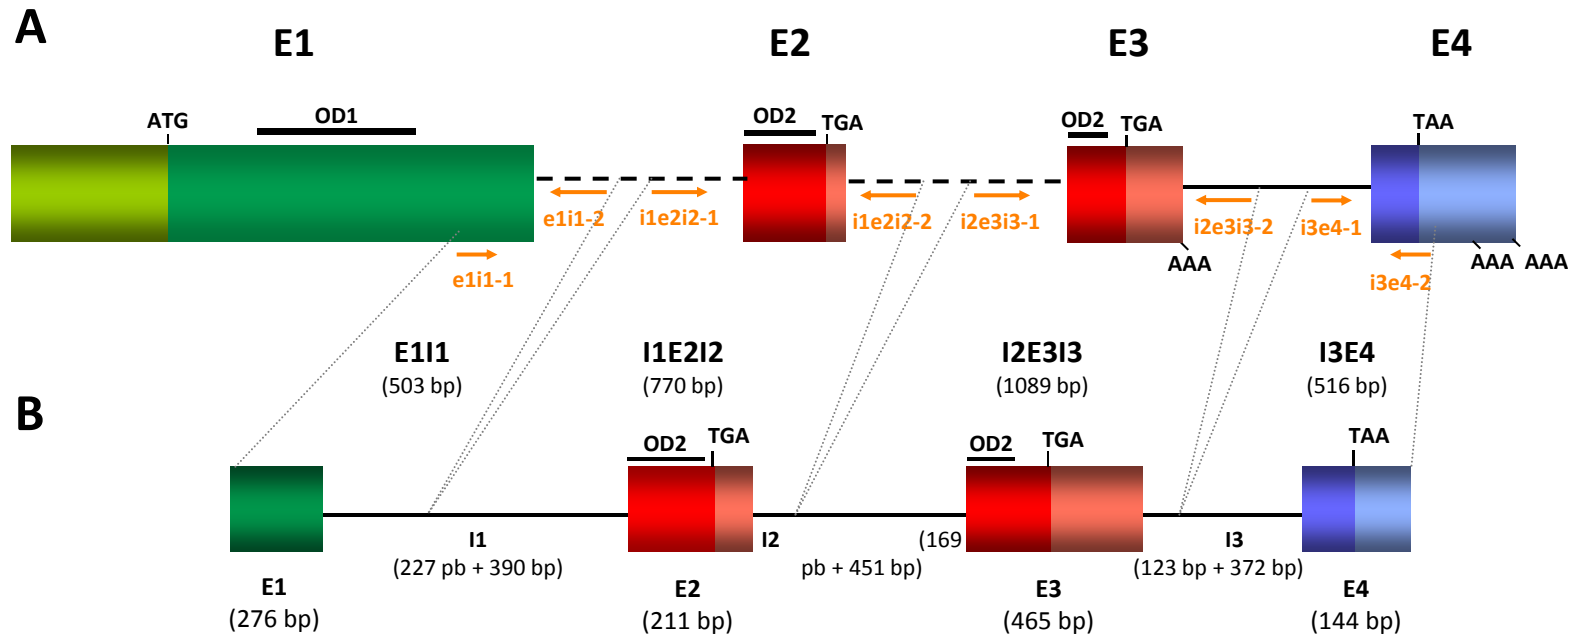

**Figure S2** Construction of the *DScmg* mini-gene. For details, see Materials and methods. **(A)** Exons (boxes, E) and introns (lines) are not drawn to scale. The dotted lines for introns 1 and 2 indicate that their lengths remain unknown. The beginning and the end of the ORF are indicated by ATG and TGA or TAA, respectively. AAA stands for poly-A(+). Orange arrows indicate the location of the primers used. **(B)** The *DScmg* construct. The dotted lines from A to B indicate the regions of the whole primary transcript that is represented in *DScmg*, where the solid lines indicate now the intron sequences.

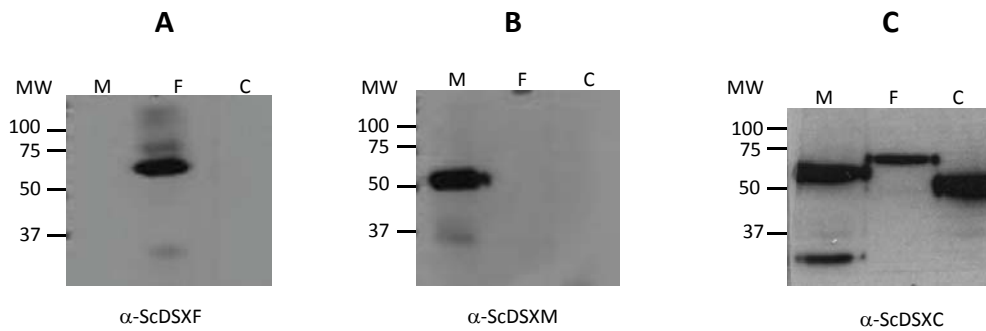

**Figure S3** Specificity of the anti-sera against the *Sciara* male and female DSX proteins. Western - blots of GST-ScDSXM (lane M), GST-ScDSXF (lane F) and GST-DSXC (lane C) probed with  $\alpha$ -ScDSXF serum **(A)**, with  $\alpha$ -ScDSXM serum **(B)** and with  $\alpha$ -ScDSXC serum **(C)**. To construct the GST-DSX fusion proteins, the procedure of Smith and Johnson [Smith DB, Johnson KS (1988) Single-step purification of polypeptides expressed in *Escherichia coli* as fusions with glutathione S-transferase. Gene 67:31–40] was followed with minor changes. To generate the GST-DSXF fusion, the whole ORF of *S. coprophila dsxF* was amplified from cDNA with primers pGexDxsC and pGexdsxF containing a restriction site for EcoRI and HindIII, respectively. To generate the GST-DSXM fusion, the whole ORF of *S. coprophila dsxM* was amplified from cDNA with primers pGexDxsC and pGexdsxM containing a restriction site for EcoRI and HindIII, respectively. To generate the GST-DSXC fusion, the fragment corresponding to the common N-terminal region of *S. coprophila dsx* was amplified from cDNA with primers pGexDxsC and pGexdsxC2 containing a restriction site for EcoRI and HindIII, respectively. The amplicons were cloned in pGEMT-easy (Promega) and sequenced. The DNA of the pGEMT-easy vectors was digested with EcoRI and HindIII and the fragments were ligated in frame into the pGex-B vector using the T4 DNA ligase (Roche). All the positive clones were sequenced to ascertain correct orientation.

**Table S1 Sequence of primers.**

| Primer             | Sequence                                           |
|--------------------|----------------------------------------------------|
| <i>dsxOD3</i>      | 5' TGGARAARTGYCGMYTRACNGCSGAYCG 3'                 |
| <i>dsxOD7</i>      | 5' GTATCACATACATNARNGGC 3'                         |
| <i>dsxSccom</i>    | 5' GGTCAGAACATAAGCGAAGTG 3'                        |
| <i>dsxSc1</i>      | 5' ATCGTCGGGATTCCTTACG 3'                          |
| <i>dsxMSc</i>      | 5' TGTA <sup>T</sup> CTTCTAGGTAAACGCAG 3'          |
| <i>dsxM2Sc</i>     | 5' CACTCATGGCTTTTATCATAAT 3'                       |
| <i>dsxFSc</i>      | 5' GTCCGTTCCACAATTGACATG 3'                        |
| <i>GW17</i>        | 5' TCGTGTTATCATCCCCGTTTGGTATCG 3'                  |
| <i>GW19</i>        | 5' TCAATCCATCGCATTGCTTAATTAC 3'                    |
| <i>dsxcom1</i>     | 5' CGTCACCGTCATTGACACCTGATCAG 3'                   |
| <i>e1i1-1</i>      | 5' ATAAGAAT <b>GCGGCCG</b> CGTCATTGACACCTGATCAG 3' |
| <i>e1i1-2</i>      | 5' GCTCTAGATGCTAATCACGACACAGACG 3'                 |
| <i>i1e2i2-1</i>    | 5' GCTCTAGATGAAAGAAGGAAATCCTAAGTC 3'               |
| <i>i1e2i2-2</i>    | 5' TGCACT <b>G</b> CAGGTTTTAGGACCAGGATGAGC 3'      |
| <i>i2e3i3-1</i>    | 5' TGCACT <b>G</b> CAGTTCTGACTGTACTTTTGTAGC 3'     |
| <i>i2e3i3-2</i>    | 5' CCCT <b>G</b> AGGTCTCGATCAAGGATGTCTG 3'         |
| <i>i3e4-1</i>      | 5' CCCT <b>G</b> AGAATCAATACGATACTGAGCATC 3'       |
| <i>i3e4-2</i>      | 5' GGG <b>T</b> ACCTAAATTCATCCATCGCATTG 3'         |
| <i>pGexdsxC</i>    | 5' <b>GGAATTC</b> GAAATGGTCTCTAATGATATATCTG 3'     |
| <i>PGexdsxC2</i>   | 5' <b>CCAAGCTT</b> GTCAGCCAGGCTTATAATGAGTATCC 3'   |
| <i>pGexdsxF</i>    | 5' <b>CCAAGCTT</b> GGTCCGTTCCACAATTGACATG 3'       |
| <i>pGexdsxM</i>    | 5' <b>CCAAGCTT</b> GTGTACTTCTAGGTAAACGCAG 3'       |
| <i>DsxSo1</i>      | 5' TATGCTCATCATCTCACAATAG 3'                       |
| <i>dsxMSo</i>      | 5' TGTA <sup>T</sup> ACTATAGTTGTAGAGTGC 3'         |
| <i>dsxFSo</i>      | 5' CAACAACCTCAACATATACGAC 3'                       |
| <i>rp49.1</i>      | 5' ATCCGCCACCAGTCGGATC 3'                          |
| <i>rp49.2</i>      | 5' TGGCGCGCTCGACAATCTC 3'                          |
| <i>rpl10.1</i>     | 5' GAGTGCATCCATTCCACGT 3'                          |
| <i>rpl10.2</i>     | 5' GTATTTGACGTTGCAACCGT 3'                         |
| <i>yp2Dm1</i>      | 5' GTCGTTGAGGCCACCATGC 3'                          |
| <i>yp2Dm2</i>      | 5' GGAGTGGTTCGCTCGCATG 3'                          |
| <i>M13 Forward</i> | 5' GTAAAACGACGGCCAG 3'                             |
| <i>M13 Reverse</i> | 5' CAGGAAACAGCTATGAC 3'                            |
| <i>Oligo d(T)</i>  | 5' TGC CAC GCT CGA CTA GTA CGT <sub>N22</sub> 3'   |
| <i>T30</i>         | 5' T <sub>N30</sub> 3'                             |
| <i>AnchorT</i>     | 5' GCCACGCGTCTGACTAGTACGT <sub>N22</sub> 3'        |
| <i>Anchor</i>      | 5' GCCACGCGTCTGACTAGTACG 3'                        |

The highlighted black bases indicate the restriction sites used in the construction of the *DScmg* mini-gen and GST fusion proteins of *S. coprophila*.

**Table S2** Insect species and GenBank accession numbers for the DSX sequences analyzed in the present work.

| DSX                  | Taxa                            | Protein Acc#           |                      |
|----------------------|---------------------------------|------------------------|----------------------|
|                      |                                 | <i>Female-specific</i> | <i>Male-specific</i> |
| <b>DIPTERA</b>       |                                 |                        |                      |
| <b>Calliphoridae</b> |                                 |                        |                      |
| 1.                   | <i>Lucilia cuprina</i>          | ADG37649               | ADG37648             |
| <b>Culicidae</b>     |                                 |                        |                      |
| 2.                   | <i>Aedes aegypti</i>            | ABD96571               | ABD96573             |
| 3.                   | <i>Anopheles gambiae</i>        | AAX48939               | AAX48940             |
| <b>Drosophilidae</b> |                                 |                        |                      |
| 4.                   | <i>Drosophila erecta</i>        | XP_001979242           | XP_001979242         |
| 5.                   | <i>Drosophila melanogaster</i>  | NP_731198              | NP_731197            |
| 6.                   | <i>Drosophila persimilis</i>    | XP_002013146           | XP_002013146         |
| 7.                   | <i>Drosophila pseudoobscura</i> | XP_003736648           | XP_001359020         |
| 8.                   | <i>Drosophila sechellia</i>     | XP_002038750           | XP_002038750         |
| 9.                   | <i>Drosophila simulans</i>      | XP_002102542           | XP_002102542         |
| 10.                  | <i>Drosophila yakuba</i>        | XP_002086778           | XP_002086778         |
| <b>Muscidae</b>      |                                 |                        |                      |
| 11.                  | <i>Musca domestica</i>          | AAR23812               | AAR23813             |
| <b>Phoridae</b>      |                                 |                        |                      |
| 12.                  | <i>Megaselia scalaris</i>       | AF283695_1             | AF283696_1           |
| <b>Sciaridae</b>     |                                 |                        |                      |
| 13.                  | <i>Sciara coprophila</i>        | HG934386               | HG934387             |
| <b>Tephritidae</b>   |                                 |                        |                      |
| 14.                  | <i>Anastrepha obliqua</i>       | AAY25166               | AAY25167             |
| 15.                  | <i>Bactrocera oleae</i>         | CAD67986               | CAD67987             |
| 16.                  | <i>Ceratitis capitata</i>       | AAN63598               | AAN63597             |
| <b>HYMENOPTERA</b>   |                                 |                        |                      |
| <b>Apidae</b>        |                                 |                        |                      |
| 17.                  | <i>Apis mellifera</i>           | ABV55180               | ABV55178             |
| <b>Pteromalidae</b>  |                                 |                        |                      |
| 18.                  | <i>Nasonia vitripennis</i>      | ACJ65508               | ACJ65511             |
| <b>LEPIDOPTERA</b>   |                                 |                        |                      |
| <b>Bombycidae</b>    |                                 |                        |                      |
| 19.                  | <i>Bombyx mori</i>              | BAB13471               | BAB13472             |
| <b>Saturniidae</b>   |                                 |                        |                      |
| 20.                  | <i>Antheraea assama</i>         | ADL40848               | ADL40846             |
| <b>COLEOPTERA</b>    |                                 |                        |                      |
| <b>Tenebrionidae</b> |                                 |                        |                      |
| 21.                  | <i>Tribolium castaneum</i>      | AFQ62106               | AFQ62105             |
| <b>DIPLOSTRACA</b>   |                                 |                        |                      |
| <b>Daphniidae</b>    |                                 |                        |                      |
| 22.                  | <i>Daphnia magna</i>            | BAJ78307               | BAJ78307             |

Table S3 Comparison of DSX proteins in insects: nº of amino acids (degree of similarity = identical plus conserved amino acids)

| Species           | DSXF       | DSXM       | N-terminal region | OD1 domain | OD1-OD2             |            | C-terminal region | C-terminal region |
|-------------------|------------|------------|-------------------|------------|---------------------|------------|-------------------|-------------------|
|                   |            |            |                   |            | Intermediate region | OD2 domain | DSXF              | DSXM              |
| <i>Sciara</i>     | 273        | 221        | 41                | 46         | 111                 | 61         | 14                | 23                |
| <i>Anophelex</i>  | 241 (0,43) | 283 (0,29) | 37 (0,21)         | 46 (0,78)  | 82 (0,23)           | 61 (0,50)  | 15 (0,42)         | 72 (0,16)         |
| <i>Aedex</i>      | 278 (0,38) | 548 (0,33) | 34 (0,17)         | 46 (0,78)  | 123 (0,24)          | 60 (0,50)  | 15 (0,42)         | 300 (0,12)        |
| <i>Ceratitit</i>  | 315 (0,44) | 394 (0,38) | 40 (0,42)         | 46 (0,80)  | 152 (0,22)          | 62 (0,54)  | 15 (0,57)         | 109 (0,12)        |
| <i>Bactrocera</i> | 321 (0,45) | 400 (0,38) | 40 (0,42)         | 46 (0,80)  | 158 (0,23)          | 62 (0,54)  | 15 (0,64)         | 109 (0,12)        |
| <i>Anastrepha</i> | 317 (0,45) | 396 (0,38) | 40 (0,42)         | 46 (0,80)  | 154 (0,22)          | 62 (0,54)  | 15 (0,64)         | 109 (0,08)        |
| <i>Drosophila</i> | 427 (0,43) | 549 (0,38) | 40 (0,40)         | 46 (0,80)  | 264 (0,24)          | 62 (0,50)  | 15 (0,64)         | 152 (0,12)        |
| <i>Musca</i>      | 397 (0,46) | 527 (0,39) | 42 (0,41)         | 46 (0,82)  | 232 (0,28)          | 62 (0,50)  | 15 (0,57)         | 160 (0,08)        |
| <i>Lucilia</i>    | 396 (0,44) | 532 (0,38) | 42 (0,41)         | 46 (0,80)  | 231 (0,25)          | 62 (0,50)  | 15 (0,57)         | 166 (0,08)        |
| <i>Megaselia</i>  | 310 (0,41) | 573 (0,40) | 37 (0,37)         | 46 (0,80)  | 151 (0,25)          | 61 (0,47)  | 15 (0,50)         | 293 (0,20)        |
| <i>Bombyx</i>     | 264 (0,39) | 266 (0,33) | 31 (0,16)         | 46 (0,78)  | 91 (0,35)           | 62 (0,49)  | 34 (0,42)         | 51 (0,04)         |
| <i>Antheraea</i>  | 265 (0,43) | 279 (0,33) | 31 (0,06)         | 46 (0,80)  | 92 (0,35)           | 62 (0,54)  | 34 (0,42)         | 63 (0,16)         |
| <i>Apis</i>       | 277 (0,24) | 336 (0,23) | 59 (0,14)         | 45 (0,60)  | 101 (0,14)          | 49 (0,32)  | 23 (0,07)         | 87 (0,12)         |
| <i>Nasonia</i>    | 235 (0,23) | 224 (0,18) | 30 (0,16)         | 45 (0,53)  | 100 (0,17)          | 47 (0,23)  | 13 (0,07)         | 5 (-)             |
| <i>Tribolium</i>  | 227(0,44)  | 322(0,30)  | 25(0,24)          | 46(0,76)   | 84(0,29)            | 61(0,52)   | 11(0,36)          | 125(0,27)         |
