# Supplementary material
Source: PubMed Central journal article supplement (PMC4574253)
Supplement: 10.1534_115.177972_genetics.115.177972-2.pdf [file 10.1534_115.177972_genetics.115.177972-2.pdf]

**Table S1 Sequence of primers.**

| <b>Primer</b>      | <b>Sequence</b>                                    |
|--------------------|----------------------------------------------------|
| <i>dsxOD3</i>      | 5' TGGARAARTGYCGMYTRACNGCSGAYCG 3'                 |
| <i>dsxOD7</i>      | 5' GTATCACATACATNARNGGC 3'                         |
| <i>dsxSccom</i>    | 5' GGTCAGAACATAAGCGAAGTG 3'                        |
| <i>dsxSc1</i>      | 5' ATCGTCGGGATTCCTTACG 3'                          |
| <i>dsxMSc</i>      | 5' TGTA <sup>T</sup> CTTCTAGGTAAACGCAG 3'          |
| <i>dsxM2Sc</i>     | 5' CACTCATGGCTTTTATCATAAT 3'                       |
| <i>dsxFSc</i>      | 5' GTCCGTTCCACAATTGACATG 3'                        |
| <i>GW17</i>        | 5' TCGTGTTATCATCCCCGTTTGGTATCG 3'                  |
| <i>GW19</i>        | 5' TCAATCCATCGCATTGCTTAATTAC 3'                    |
| <i>dsxcom1</i>     | 5' CGTCACCGTCATTGACACCTGATCAG 3'                   |
| <i>e1i1-1</i>      | 5' ATAAGAAT <b>GCGGCCG</b> CGTCATTGACACCTGATCAG 3' |
| <i>e1i1-2</i>      | 5' GCTCTAGATGCTAATCACGACACAGACG 3'                 |
| <i>i1e2i2-1</i>    | 5' GCTCTAGATGAAAGAAGGAAATCCTAAGTC 3'               |
| <i>i1e2i2-2</i>    | 5' TGCACT <b>G</b> CAGGTTTTAGGACCAGGATGAGC 3'      |
| <i>i2e3i3-1</i>    | 5' TGCACT <b>G</b> CAGTTCTGACTGTACTTTTGTAGC 3'     |
| <i>i2e3i3-2</i>    | 5' CCCT <b>G</b> AGGTCTCGATCAAGGATGTCTG 3'         |
| <i>i3e4-1</i>      | 5' CCCT <b>G</b> AGAATCAATACGATACTGAGCATC 3'       |
| <i>i3e4-2</i>      | 5' GGG <b>T</b> ACCTAAATTCATCCATCGCATTG 3'         |
| <i>pGexdsxC</i>    | 5' <b>GGAATTC</b> GAAATGGTCTCTAATGATATATCTG 3'     |
| <i>pGexdsxC2</i>   | 5' <b>CCAAGCTT</b> GTCAGCCAGGCTTATAATGAGTATCC 3'   |
| <i>pGexdsxF</i>    | 5' <b>CCAAGCTT</b> GGTCCGTTCCACAATTGACATG 3'       |
| <i>pGexdsxM</i>    | 5' <b>CCAAGCTT</b> GTGTACTTCTAGGTAAACGCAG 3'       |
| <i>DsxSo1</i>      | 5' TATGCTCATCATCTCACAATAG 3'                       |
| <i>dsxMSo</i>      | 5' TGTA <sup>T</sup> ACTATAGTTGTAGAGTGC 3'         |
| <i>dsxFSo</i>      | 5' CAACAACCTCAACATATACGAC 3'                       |
| <i>rp49.1</i>      | 5' ATCCGCCACCAGTCGGATC 3'                          |
| <i>rp49.2</i>      | 5' TGGCGCGCTCGACAATCTC 3'                          |
| <i>rpl10.1</i>     | 5' GAGTGCATCCATTCCACGT 3'                          |
| <i>rpl10.2</i>     | 5' GTATTTGACGTTGCAACCGT 3'                         |
| <i>yp2Dm1</i>      | 5' GTCGTTGAGGCCACCATGC 3'                          |
| <i>yp2Dm2</i>      | 5' GGAGTGGTTCGCTCGCATG 3'                          |
| <i>M13 Forward</i> | 5' GTAAAACGACGGCCAG 3'                             |
| <i>M13 Reverse</i> | 5' CAGGAAACAGCTATGAC 3'                            |
| <i>Oligo d(T)</i>  | 5' TGC CAC GCT CGA CTA GTA CGT <sub>N22</sub> 3'   |
| <i>T30</i>         | 5' T <sub>N30</sub> 3'                             |
| <i>AnchorT</i>     | 5' GCCACGCGTCGACTAGTACGT <sub>N22</sub> 3'         |
| <i>Anchor</i>      | 5' GCCACGCGTCGACTAGTACG 3'                         |

The highlighted black bases indicate the restriction sites used in the construction of the *DScmg* mini-gen and GST fusion proteins of *S. coprophila*.
