# Supplementary material
Source: PubMed Central journal article supplement (PMC4574253)
Supplement: 10.1534_115.177972_genetics.115.177972-3.pdf [file 10.1534_115.177972_genetics.115.177972-3.pdf]

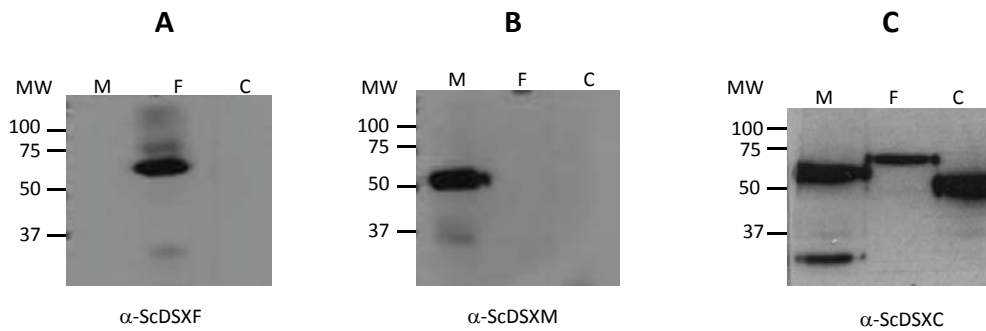

**Figure S3** Specificity of the anti-sera against the *Sciara* male and female DSX proteins. Western blots of GST-ScDSXM (lane M), GST-ScDSXF (lane F) and GST-DSXC (lane C) probed with  $\alpha$ -ScDSXF serum (A), with  $\alpha$ -ScDSXM serum (B) and with  $\alpha$ -ScDSXC serum (C). To construct the GST-DSX fusion proteins, the procedure of Smith and Johnson [Smith DB, Johnson KS (1988) Single-step purification of polypeptides expressed in *Escherichia coli* as fusions with glutathione S-transferase. Gene 67:31–40] was followed with minor changes. To generate the GST-DSXF fusion, the whole ORF of *S. coprophila dsxF* was amplified from cDNA with primers pGexDxsC and pGexdsxF containing a restriction site for EcoRI and HindIII, respectively. To generate the GST-DSXM fusion, the whole ORF of *S. coprophila dsxM* was amplified from cDNA with primers pGexDxsC and pGexdsxM containing a restriction site for EcoRI and HindIII, respectively. To generate the GST-DSXC fusion, the fragment corresponding to the common N-terminal region of *S. coprophila dsx* was amplified from cDNA with primers pGexDxsC and pGexdsxC2 containing a restriction site for EcoRI and HindIII, respectively. The amplicons were cloned in pGEMT-easy (Promega) and sequenced. The DNA of the pGEMT-easy vectors was digested with EcoRI and HindIII and the fragments were ligated in frame into the pGex-B vector using the T4 DNA ligase (Roche). All the positive clones were sequenced to ascertain correct orientation.
