# Supplementary material
Source: PubMed Central journal article supplement (PMC4574253)
Supplement: 10.1534_115.177972_genetics.115.177972-4.pdf [file 10.1534_115.177972_genetics.115.177972-4.pdf]

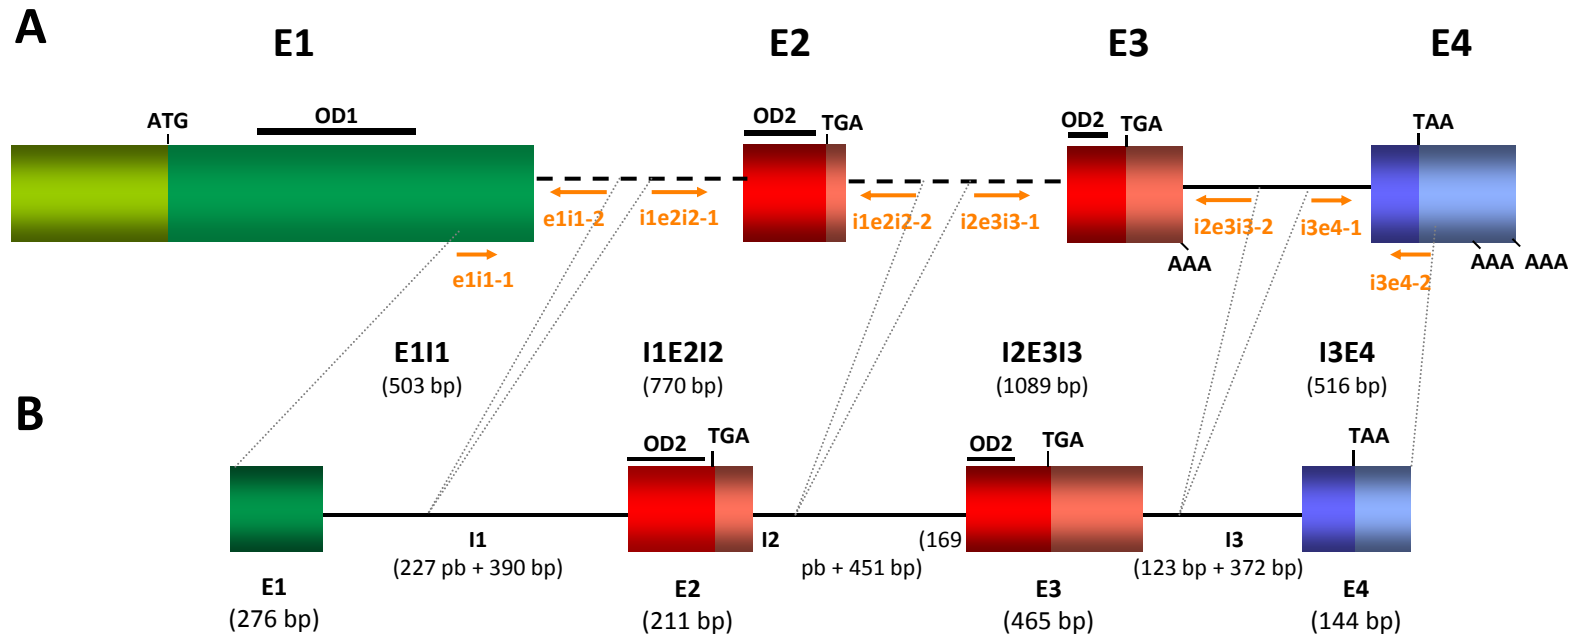

**Figure S2** Construction of the *DScmg* mini-gene. For details, see Materials and methods. **(A)** Exons (boxes, E) and introns (lines) are not drawn to scale. The dotted lines for introns 1 and 2 indicate that their lengths remain unknown. The beginning and the end of the ORF are indicated by ATG and TGA or TAA, respectively. AAA stands for poly-A(+). Orange arrows indicate the location of the primers used. **(B)** The *DScmg* construct. The dotted lines from A to B indicate the regions of the whole primary transcript that is represented in *DScmg*, where the solid lines indicate now the intron sequences.
