# Supplementary material
Source: PubMed Central journal article supplement (PMC4574253)
Supplement: 10.1534_115.177972_genetics.115.177972-5.pdf [file 10.1534_115.177972_genetics.115.177972-5.pdf]

Table S3 Comparison of DSX proteins in insects: nº of amino acids (degree of similarity = identical plus conserved amino acids)

| Species           | DSXF       | DSXM       | N-terminal region | OD1 domain | OD1-OD2                |            | C-terminal region<br>DSXF | C-terminal region<br>DSXM |
|-------------------|------------|------------|-------------------|------------|------------------------|------------|---------------------------|---------------------------|
|                   |            |            |                   |            | Intermediate<br>region | OD2 domain |                           |                           |
| <i>Sciara</i>     | 273        | 221        | 41                | 46         | 111                    | 61         | 14                        | 23                        |
| <i>Anophelex</i>  | 241 (0,43) | 283 (0,29) | 37 (0,21)         | 46 (0,78)  | 82 (0,23)              | 61 (0,50)  | 15 (0,42)                 | 72 (0,16)                 |
| <i>Aedex</i>      | 278 (0,38) | 548 (0,33) | 34 (0,17)         | 46 (0,78)  | 123 (0,24)             | 60 (0,50)  | 15 (0,42)                 | 300 (0,12)                |
| <i>Ceratitit</i>  | 315 (0,44) | 394 (0,38) | 40 (0,42)         | 46 (0,80)  | 152 (0,22)             | 62 (0,54)  | 15 (0,57)                 | 109 (0,12)                |
| <i>Bactrocera</i> | 321 (0,45) | 400 (0,38) | 40 (0,42)         | 46 (0,80)  | 158 (0,23)             | 62 (0,54)  | 15 (0,64)                 | 109 (0,12)                |
| <i>Anastrepha</i> | 317 (0,45) | 396 (0,38) | 40 (0,42)         | 46 (0,80)  | 154 (0,22)             | 62 (0,54)  | 15 (0,64)                 | 109 (0,08)                |
| <i>Drosophila</i> | 427 (0,43) | 549 (0,38) | 40 (0,40)         | 46 (0,80)  | 264 (0,24)             | 62 (0,50)  | 15 (0,64)                 | 152 (0,12)                |
| <i>Musca</i>      | 397 (0,46) | 527 (0,39) | 42 (0,41)         | 46 (0,82)  | 232 (0,28)             | 62 (0,50)  | 15 (0,57)                 | 160 (0,08)                |
| <i>Lucilia</i>    | 396 (0,44) | 532 (0,38) | 42 (0,41)         | 46 (0,80)  | 231 (0,25)             | 62 (0,50)  | 15 (0,57)                 | 166 (0,08)                |
| <i>Megaselia</i>  | 310 (0,41) | 573 (0,40) | 37 (0,37)         | 46 (0,80)  | 151 (0,25)             | 61 (0,47)  | 15 (0,50)                 | 293 (0,20)                |
| <i>Bombyx</i>     | 264 (0,39) | 266 (0,33) | 31 (0,16)         | 46 (0,78)  | 91 (0,35)              | 62 (0,49)  | 34 (0,42)                 | 51 (0,04)                 |
| <i>Antheraea</i>  | 265 (0,43) | 279 (0,33) | 31 (0,06)         | 46 (0,80)  | 92 (0,35)              | 62 (0,54)  | 34 (0,42)                 | 63 (0,16)                 |
| <i>Apis</i>       | 277 (0,24) | 336 (0,23) | 59 (0,14)         | 45 (0,60)  | 101 (0,14)             | 49 (0,32)  | 23 (0,07)                 | 87 (0,12)                 |
| <i>Nasonia</i>    | 235 (0,23) | 224 (0,18) | 30 (0,16)         | 45 (0,53)  | 100 (0,17)             | 47 (0,23)  | 13 (0,07)                 | 5 (-)                     |
| <i>Tribolium</i>  | 227(0,44)  | 322(0,30)  | 25(0,24)          | 46(0,76)   | 84(0,29)               | 61(0,52)   | 11(0,36)                  | 125(0,27)                 |
