# Supplementary material
Source: PubMed Central journal article supplement (PMC4574253)
Supplement: 10.1534_115.177972_genetics.115.177972-6.pdf [file 10.1534_115.177972_genetics.115.177972-6.pdf]

**Table S2** Insect species and GenBank accession numbers for the DSX sequences analyzed in the present work.

| DSX                  | Taxa                            | Protein Acc#           |                      |
|----------------------|---------------------------------|------------------------|----------------------|
|                      |                                 | <i>Female-specific</i> | <i>Male-specific</i> |
| <b>DIPTERA</b>       |                                 |                        |                      |
| <b>Calliphoridae</b> |                                 |                        |                      |
| 1.                   | <i>Lucilia cuprina</i>          | ADG37649               | ADG37648             |
| <b>Culicidae</b>     |                                 |                        |                      |
| 2.                   | <i>Aedes aegypti</i>            | ABD96571               | ABD96573             |
| 3.                   | <i>Anopheles gambiae</i>        | AAX48939               | AAX48940             |
| <b>Drosophilidae</b> |                                 |                        |                      |
| 4.                   | <i>Drosophila erecta</i>        | XP_001979242           | XP_001979242         |
| 5.                   | <i>Drosophila melanogaster</i>  | NP_731198              | NP_731197            |
| 6.                   | <i>Drosophila persimilis</i>    | XP_002013146           | XP_002013146         |
| 7.                   | <i>Drosophila pseudoobscura</i> | XP_003736648           | XP_001359020         |
| 8.                   | <i>Drosophila sechellia</i>     | XP_002038750           | XP_002038750         |
| 9.                   | <i>Drosophila simulans</i>      | XP_002102542           | XP_002102542         |
| 10.                  | <i>Drosophila yakuba</i>        | XP_002086778           | XP_002086778         |
| <b>Muscidae</b>      |                                 |                        |                      |
| 11.                  | <i>Musca domestica</i>          | AAR23812               | AAR23813             |
| <b>Phoridae</b>      |                                 |                        |                      |
| 12.                  | <i>Megaselia scalaris</i>       | AF283695_1             | AF283696_1           |
| <b>Sciaridae</b>     |                                 |                        |                      |
| 13.                  | <i>Sciara coprophila</i>        | HG934386               | HG934387             |
| <b>Tephritidae</b>   |                                 |                        |                      |
| 14.                  | <i>Anastrepha obliqua</i>       | AAY25166               | AAY25167             |
| 15.                  | <i>Bactrocera oleae</i>         | CAD67986               | CAD67987             |
| 16.                  | <i>Ceratitis capitata</i>       | AAN63598               | AAN63597             |
| <b>HYMENOPTERA</b>   |                                 |                        |                      |
| <b>Apidae</b>        |                                 |                        |                      |
| 17.                  | <i>Apis mellifera</i>           | ABV55180               | ABV55178             |
| <b>Pteromalidae</b>  |                                 |                        |                      |
| 18.                  | <i>Nasonia vitripennis</i>      | ACJ65508               | ACJ65511             |
| <b>LEPIDOPTERA</b>   |                                 |                        |                      |
| <b>Bombycidae</b>    |                                 |                        |                      |
| 19.                  | <i>Bombyx mori</i>              | BAB13471               | BAB13472             |
| <b>Saturniidae</b>   |                                 |                        |                      |
| 20.                  | <i>Antheraea assama</i>         | ADL40848               | ADL40846             |
| <b>COLEOPTERA</b>    |                                 |                        |                      |
| <b>Tenebrionidae</b> |                                 |                        |                      |
| 21.                  | <i>Tribolium castaneum</i>      | AFQ62106               | AFQ62105             |
| <b>DIPLOSTRACA</b>   |                                 |                        |                      |
| <b>Daphniidae</b>    |                                 |                        |                      |
| 22.                  | <i>Daphnia magna</i>            | BAJ78307               | BAJ78307             |
