# Supplementary material
Source: PubMed Central journal article supplement (PMC4574253)
Supplement: 10.1534_115.177972_genetics.115.177972-7.pdf [file 10.1534_115.177972_genetics.115.177972-7.pdf]

**A***Sciara coprophila dsx*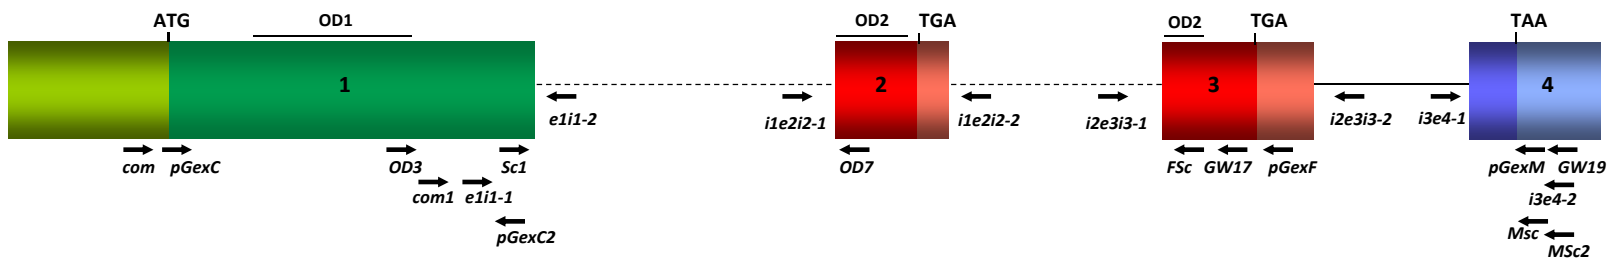**B***Sciara ocellaris dsx*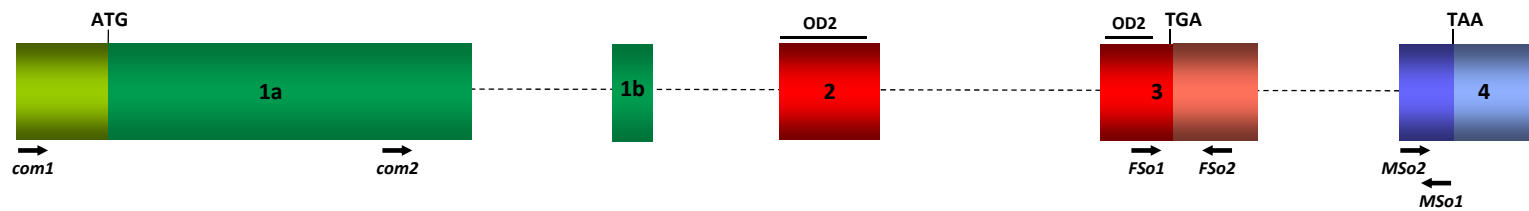

**Figure S1** Location of the primers used in this work. The prefix-*dsx* has been omitted in the name of the primers.
